# Supplementary material
Source: publisher figshare collection journal article supplement (https://acs.figshare.com/ndownloader/files/14690660)
Supplement: Supplementary file 1 [file 14690660]

## Supporting Information

### **Tetragonal to Monoclinic Crystalline Phase Change of BiVO<sub>4</sub> via Microwave-Hydrothermal Reaction: In Correlation with Visible-Light-Driven Photocatalytic Performance**

*Tulsi Satyavir Dabodiya, Praneetha Selvarasu and Arumugam Vadivel Murugan\**

*Advanced Functional Nanostructured Materials Research Laboratory, Centre for Nanoscience and Technology, Madanjeet School of Green Energy Technologies, Pondicherry University (A Central University), Dr. R. Vankataraman Nagar, Kalapet, Puducherry-605014, India.*

*\*E-mail: avmrajeshwar@gmail.com; avmurugan.nst@pondiuni.edu.in.*

Phone: +91-413-2654975

**Material Characterizations.** A Rigaku Ultima IV X-ray diffractometer with Cu K $\alpha$  radiation ( $\lambda = 1.54 \text{ \AA}$ ) at 40 kV and 30 mA was used to scan the diffraction angles from  $10^\circ$  to  $80^\circ$  with step size of  $0.02^\circ/\text{second}$  to carry out X-ray Diffraction Analysis (XRD) and compared with standard ICDD (International Centre for Diffraction Data). GSAS software and CIF files for both monoclinic scheelite and tetragonal zircon BiVO $_4$  phase were used for Rietveld analyses for all samples. The crystallite sizes of the samples were calculated using Scherrer equation. Raman spectroscopic analysis were performed using a room-temperature confocal Raman spectrometer (Renishaw in-Via) with laser excitation energy of 785 nm. The diffused reflection spectra (DRS) of the synthesized BiVO $_4$  samples were recorded using a UV-visible spectrophotometer (UV-2550, Shimadzu, Japan). The surface morphologies of the synthesized samples were imaged with a Field Emission-Scanning Electron Microscopy (FE-SEM). (Quanta-FEG450) equipped with an energy dispersive X-ray analyzer (Bruker). High Resolution Transmission Electron Microscopy images were carried out to obtain the images (HR-TEM) JOEL/JEM 2100USA. For HR-TEM analysis, the samples were initially dispersed in ethanol using an ultrasonicator and dropped on a copper grid. FLUOROLOG–FL3-11 (Jobin Yvon) were used to record the steady-state PL emission spectra with excitation wavelengths from 300 to 480 nm and spectral resolution of 3 nm. Time-resolved photoluminescence (TRPL) spectra were also measured using FLUOROLOG–FL3-11 with a 488 nm femtosecond laser.

## Result and discussion

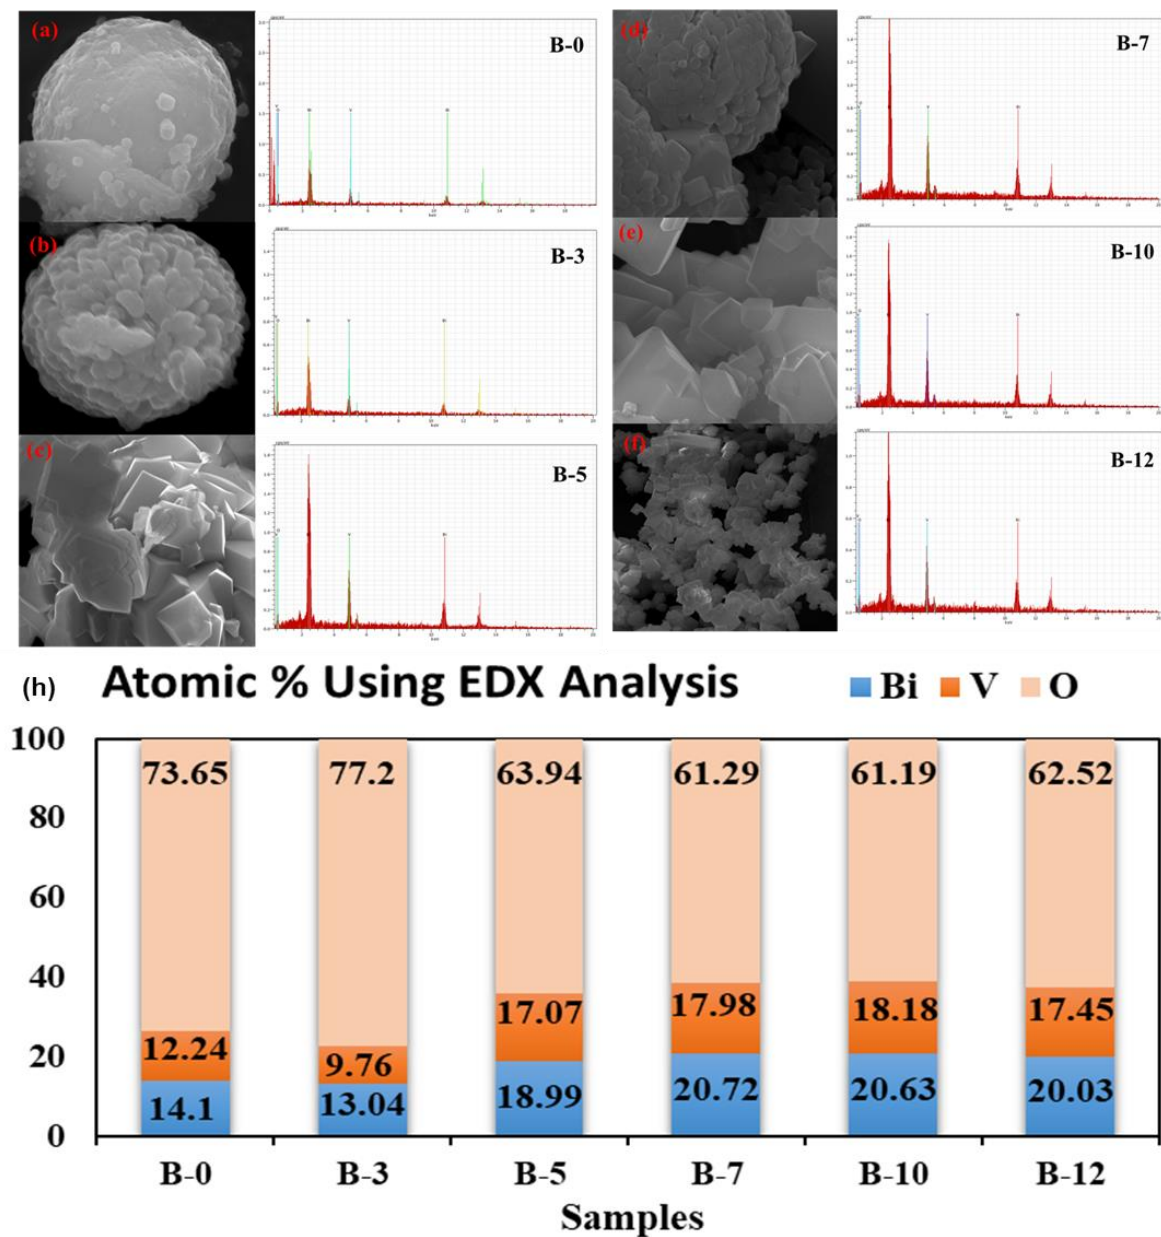

**Figure S1.** EDX spectra of BiVO<sub>4</sub> material synthesis at various hydrolysed time named as (b) B-0, (c) B-3, (d) B-5, (e) B-7, (f) B-10, and (g) B-12 samples and (h) Atomic weight % of elements of B-0 to B-12 samples.

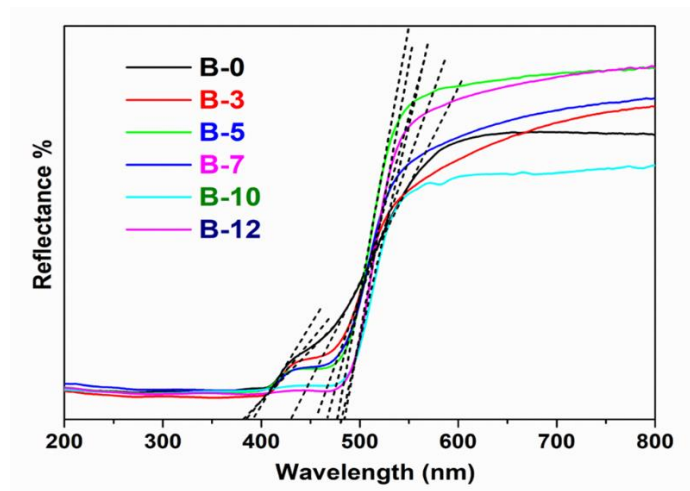

**Figure S2.** UV Reflectance spectra for B-0, B-3, B-5, B-7, B-10, and B-12 samples

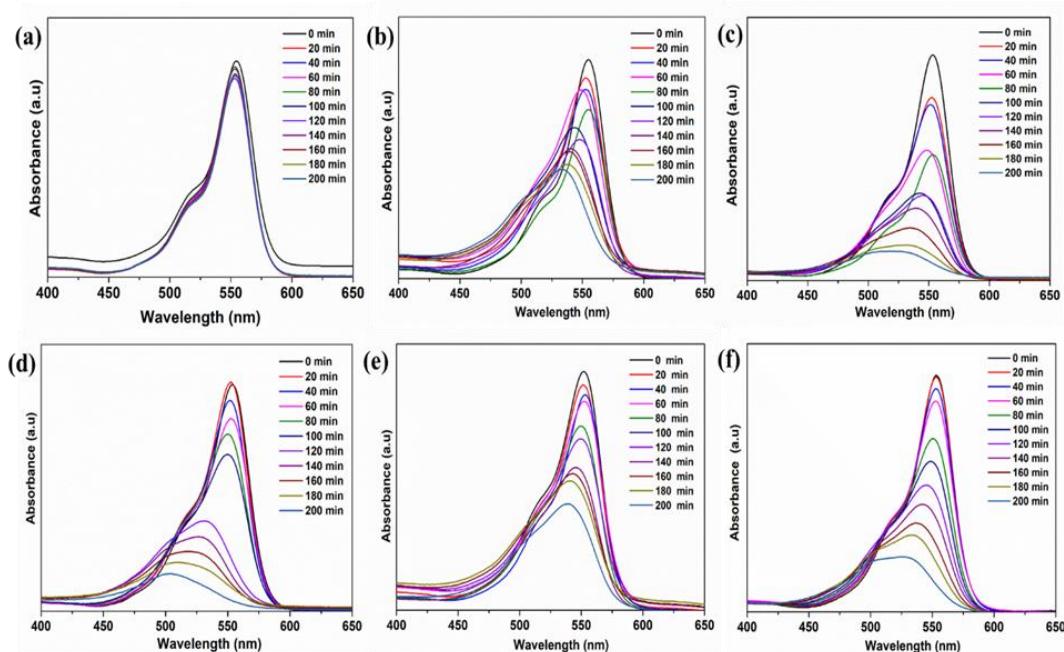

**Figure S3.** UV absorption of RhB aqueous solution (a) Blank Dye without photocatalyst, (b) B-0, (c) B-3, (d) B-5, (e) B-10, and (f) B-12 samples.

### Photocatalyst test

The photocatalyst experiment was done near to the Advanced Functional Nanomaterials lab, Centre for Nanoscience and Technology, Pondicherry university campus (geographical location-12.0219° N, 79.8575° E), India. Solar intensity variation during the experiment was given in figure below.

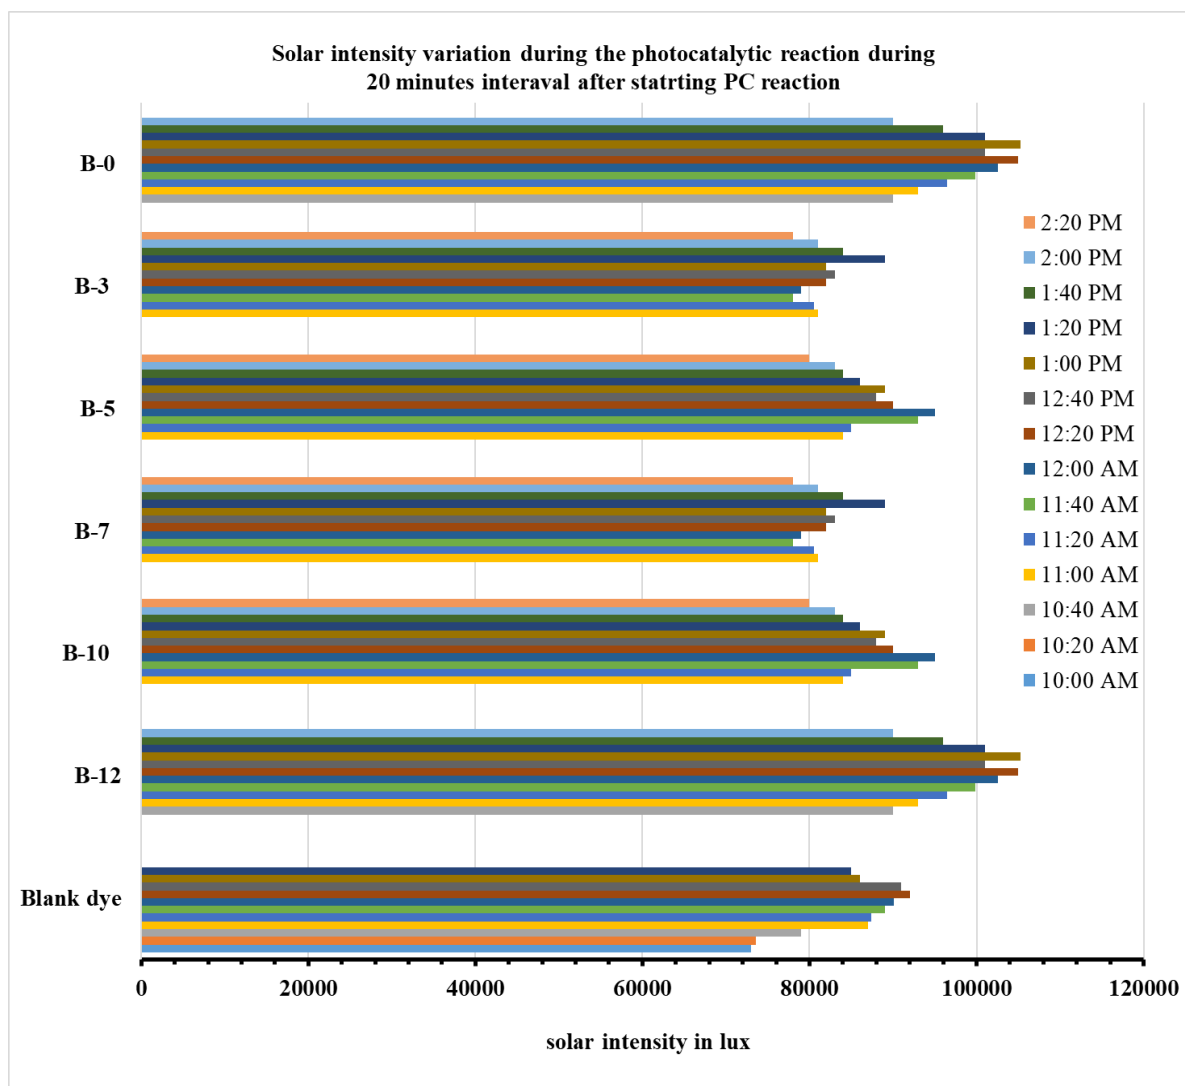

**Figure S4 .**Natural sun intensity variation during the Photocatalytic reactions (a) blank dye (b) B-0, (c) B-3, (d) B-5, (e) B-7, (f) B-10, and (g) B-12 samples. The intensity in lux.

### Trapping experiment for detecting active species:

Description of trapping experiment for detecting active species during photocatalytic reaction in presence of B-7 material was done as previously reported.<sup>1,2</sup> 2.5 mM IPA (isopropanol), 2.5 mM MeOH (methyl alcohol), and 2.5 mM EDTA-2Na (ethylenediamine tetraacetic acid disodium) were mixed with 250 ml aqueous solution Rhodamine B solution in presence of 0.250g B-7 material.

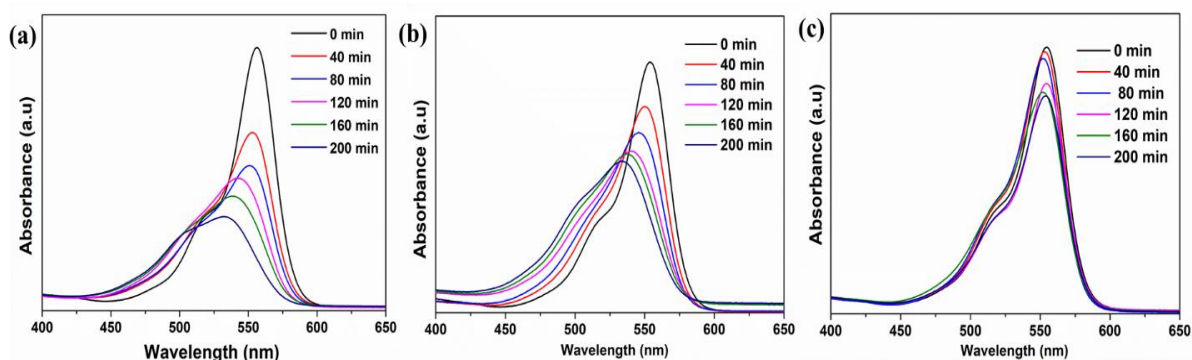

**Figure S5.** UV absorption spectra for trapping experiment for detecting active species of B-7, BiVO<sub>4</sub> photocatalytic material in presence of (a) IPA (b) MeOH (c) EDTA.

### Recycle test:

In the recycle experiment, the recovered photocatalyst was centrifuge, washed with acetone for removing any impurities, and dried at 70°C for 10 h. Then, the photocatalyst was weighed again to add the lost portion and used for the next run.

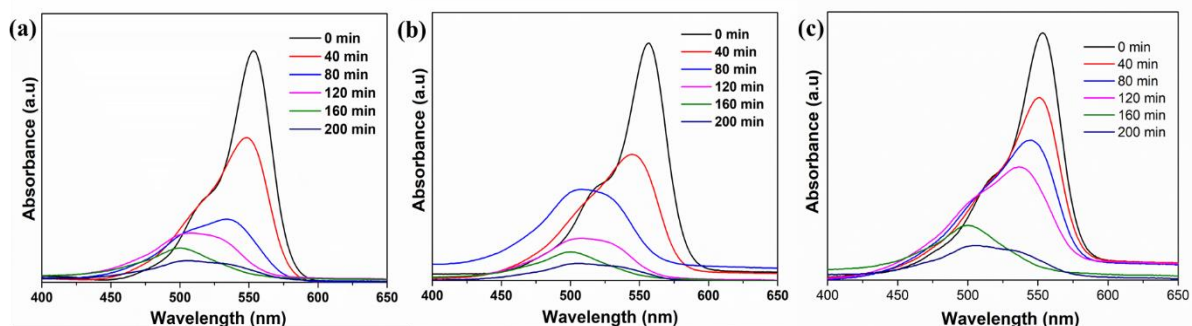

**Figure S6.** Recycle test absorption spectra for B-7, BiVO<sub>4</sub> photocatalytic material, (a) recycle test 1, (b) recycle test 2, (c) recycle test 3.

**Table S1.** XRD Rietveld Refinement Analysis structural features for BiVO<sub>4</sub> material.

| S.No. | Rp    | Rwp   | $\chi^2$ | R <sub>Bragg</sub> |
|-------|-------|-------|----------|--------------------|
| B-0   | 18.91 | 24.97 | 1.419    | 13.06              |
| B-3   | 17.68 | 23.27 | 1.429    | 11.34              |
| B-5   | 12.83 | 25.06 | 1.883    | 12.83              |
| B-7   | 17.99 | 24.59 | 1.509    | 11.47              |
| B-10  | 21.63 | 28.71 | 1.832    | 15.73              |
| B-12  | 19.88 | 27.38 | 1.534    | 12.55              |

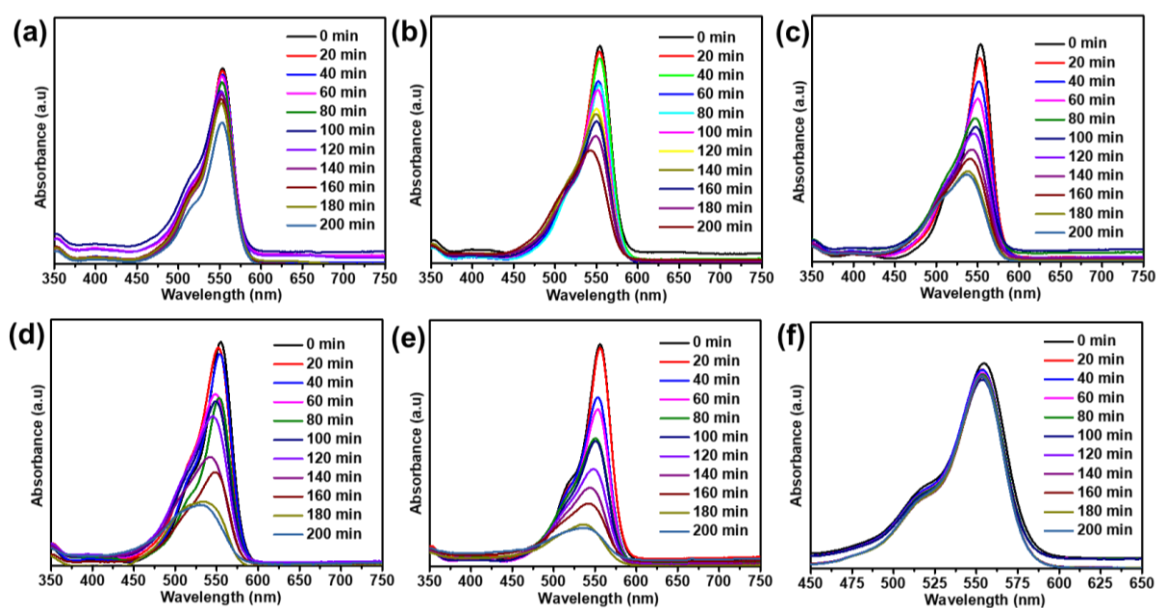

**Figure S7.** UV absorption curves of RhB aqueous solution under simulated sunlight in presence of (a) B-0, (b) B-3, (c) B-5, (d) B-7, (e) B-10 samples and (f) Blank Dye without photocatalyst.

## References:

1. Dong, S.; Feng, J.; Li, Y.; Hu, L.; Liu, M.; Wang, Y.; Pi, Y.; Sun, J.; Sun, J. Shape-controlled synthesis of  $\text{BiVO}_4$  hierarchical structures with unique natural-sunlight-driven photocatalytic activity, *Applied Catalysis B: Environmental*, **2014**, 152–153, 413–424.
2. Fan, T.; Chen, C.; Tang, Z. Hydrothermal synthesis of novel  $\text{BiFeO}_3/\text{BiVO}_4$  heterojunctions with enhanced photocatalytic activities under visible light irradiation, *RSC Adv.*, **2016**, **6**, 9994-10000.
3. Liu, H.; Hou, H.; Gao, F.; Yao, X.; and Yang, W. Tailored Fabrication of Thoroughly Mesoporous  $\text{BiVO}_4$  Nanofibers and Their Visible-Light Photocatalytic Activities, *ACS Appl. Mater. Interfaces*, **2016**, **8**, 1929–1936.
